# Supplementary material for: Self-healing of abrasion damage on epoxy resin controlled by ionic liquid
Source: Royal Society of Chemistry journal article supplement (doi:10.1039/c6ra05503f), 2016-01-01
Supplement: c6ra05503f1.pdf [file c6ra05503f1.pdf]

## Self-healing of abrasion damage on epoxy resin controlled by ionic liquid

N.Saurín, J. Sanes, F.J. Carrión, M.D. Bermúdez

Grupo de Ciencia de Materiales e Ingeniería Metalúrgica.  
Departamento de Ingeniería de Materiales y Fabricación.  
Universidad Politécnica de Cartagena.  
Campus de la Muralla del Mar. 30202-Cartagena (Spain)

**Table S1. Hardness values (standard deviations)**

| <b>Hardness</b> | <b>ER</b>      | <b>ER+7%IL</b> | <b>ER+8%IL</b> | <b>ER+9%IL</b>  | <b>ER+12%IL</b> |
|-----------------|----------------|----------------|----------------|-----------------|-----------------|
| <b>Shore D</b>  | 82.8<br>(0.23) | 76.5<br>(0.65) | 77.2<br>(0.46) | 71.8<br>(0.78)  | 75.8<br>(0.37)  |
| <b>HV</b>       | 18.9<br>(1.32) | 15.6<br>(0.56) | 14.2<br>(0.38) | 15.12<br>(0.65) | 10.88<br>(0.81) |

**Table S2. Dynamic mechanical properties**

| <b>Material</b> | <b>T (°C)</b> | <b>E' (MPa)<br/>(onset)</b> | <b>T (°C)</b> | <b>E'' (MPa)<br/>(maximum)</b> | <b>T (°C)</b> | <b>tan <math>\delta</math><br/>(E''/E')<br/>(maximum)</b> |
|-----------------|---------------|-----------------------------|---------------|--------------------------------|---------------|-----------------------------------------------------------|
| <b>ER</b>       | 60.45         | 940.6                       | 62.46         | 289.6                          | 70.89         | 1.16                                                      |
| <b>ER +7%IL</b> | 44.47         | 767.2                       | 33.92         | 240.1                          | 57.97         | 0.90                                                      |
| <b>ER +9%IL</b> | 48.61         | 820.3                       | 49.44         | 253.8                          | 62.21         | 1.04                                                      |
| <b>ER+12%IL</b> | 41.11         | 767.8                       | 35.38         | 262.6                          | 54.84         | 0.95                                                      |

a)

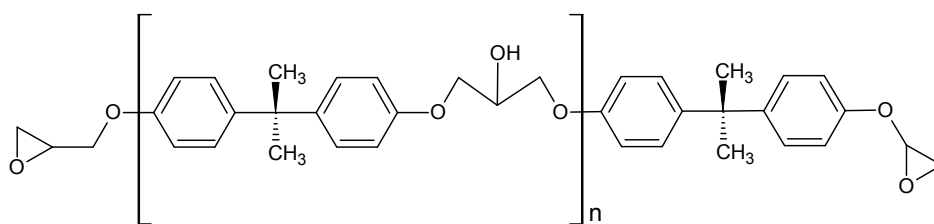

DGEBA

b)

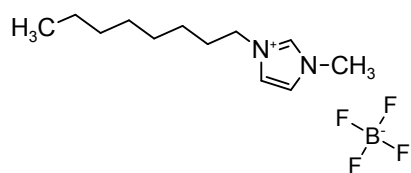

1-octyl-3-methylimidazolium IL

c)

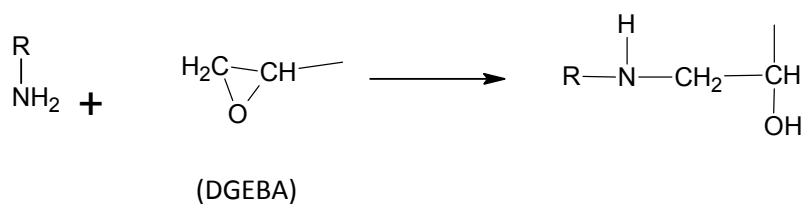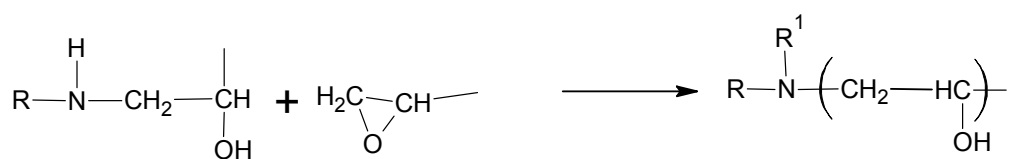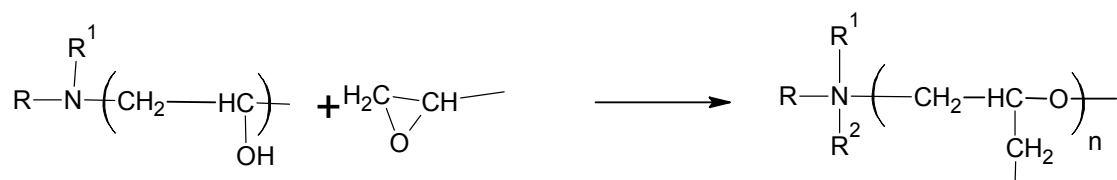

Figure S1. a) Prepolymer; b) Ionic liquid; c) Scheme of the resin formation process by amine hardener.

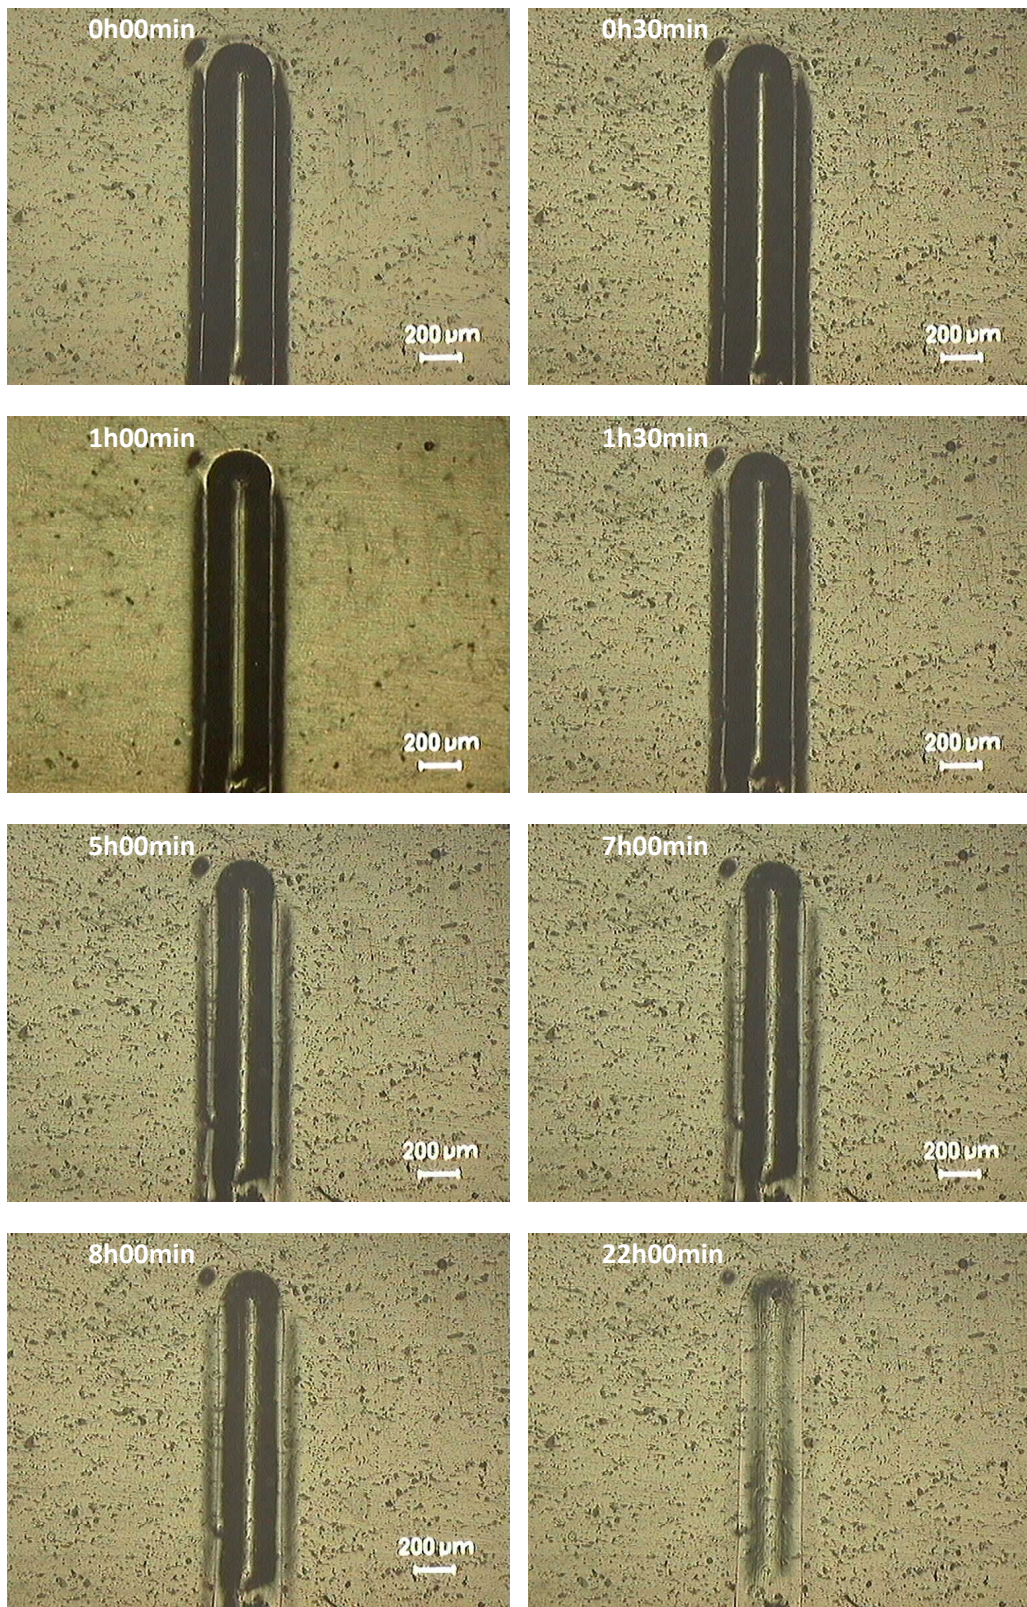

**Figure S2. Time sequence of optical micrographs of the scratching wear track on ER+7%IL.**

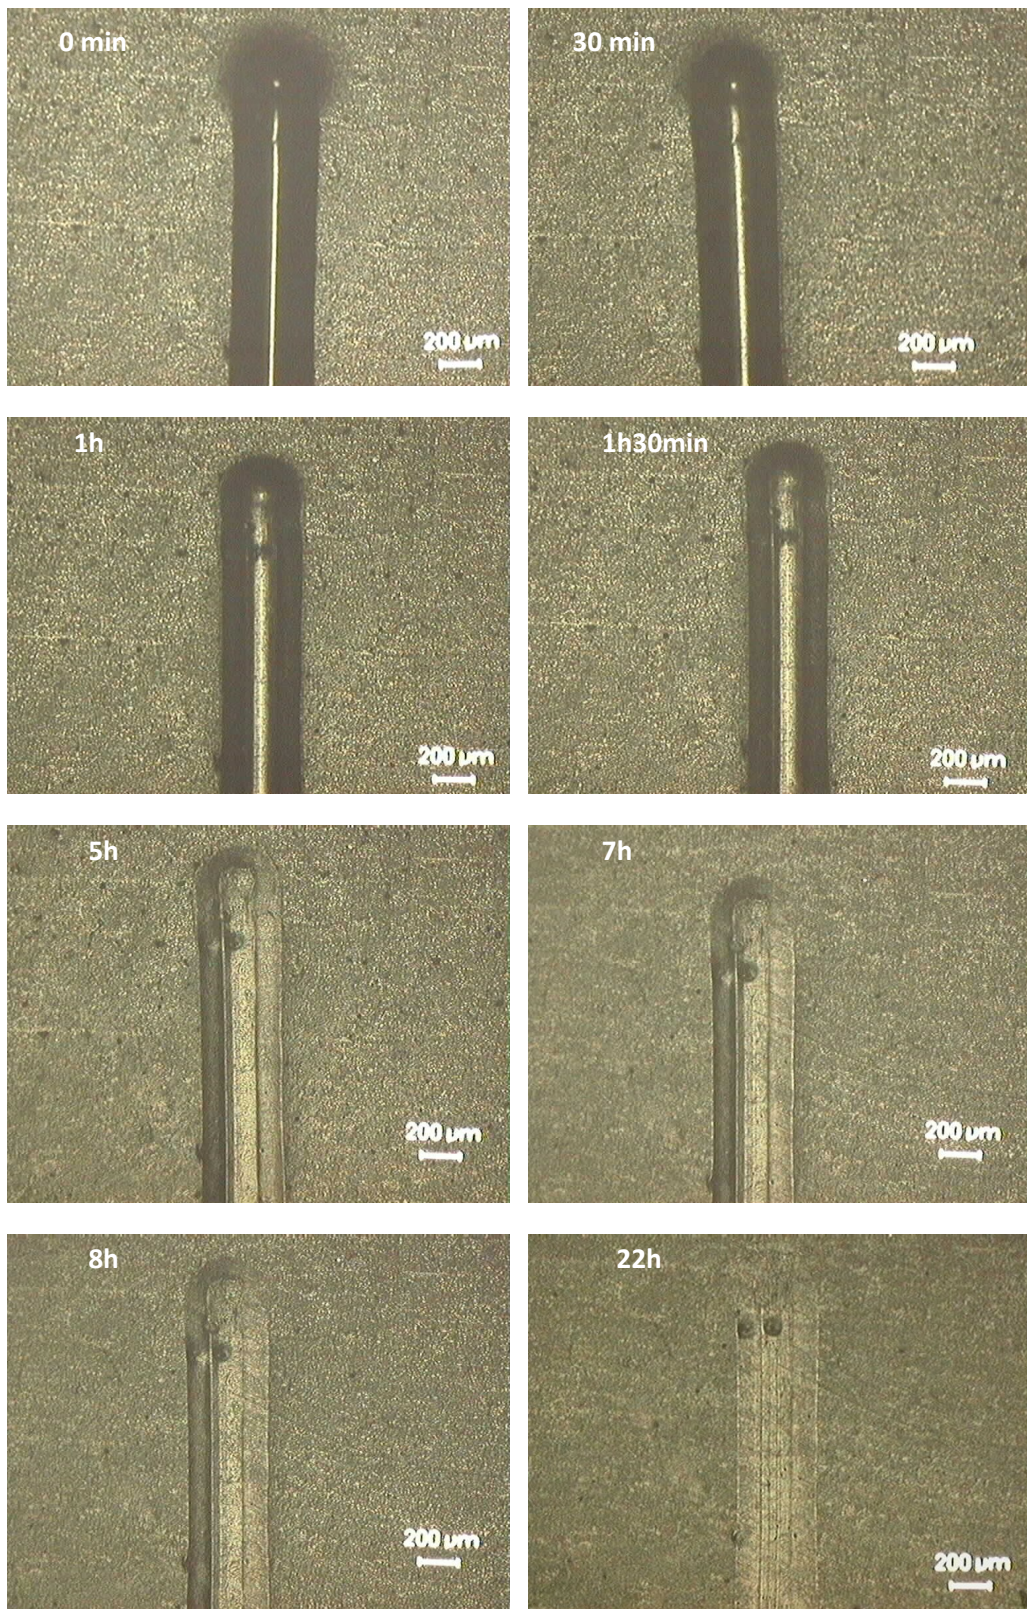

**Figure S3. Time sequence of optical micrographs of the scratching wear track on ER+9%IL.**

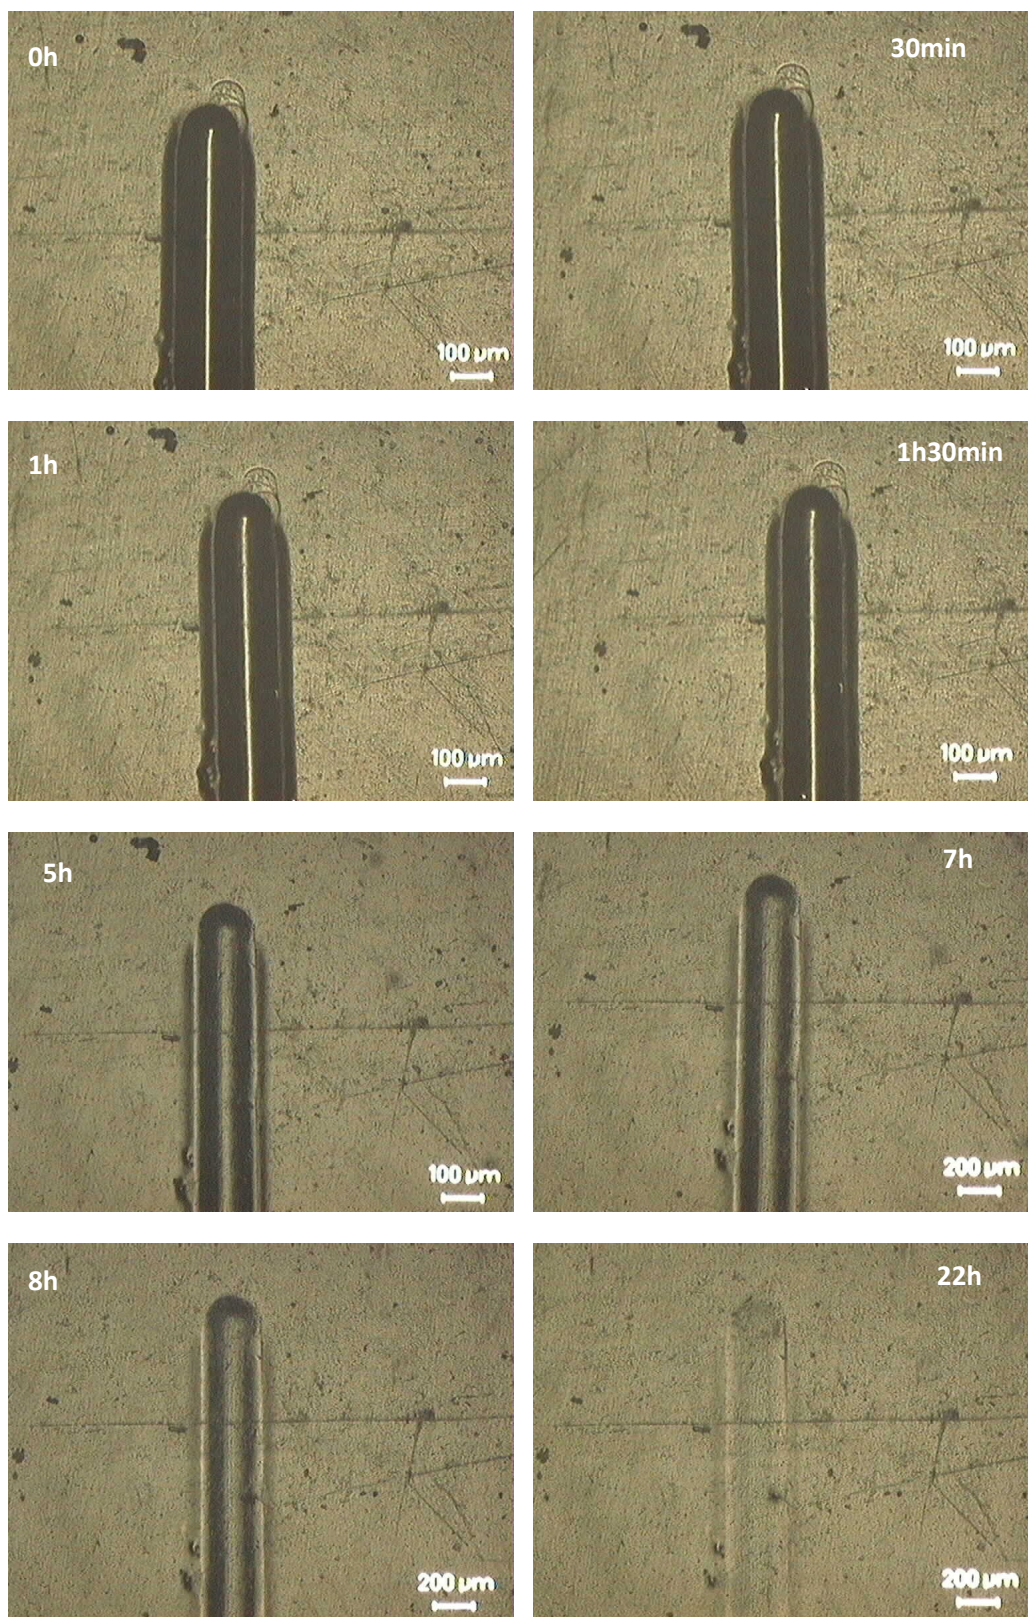

**Figure S4. Time sequence of optical micrographs of the scratching wear track on ER+12%IL.**

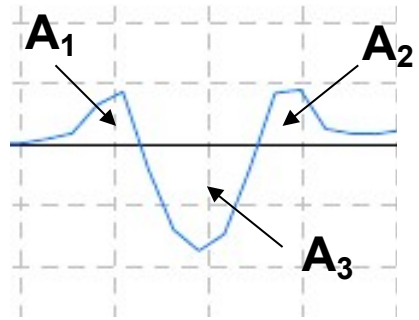

**Figure S5. Cross section areas of the wear tracks.**

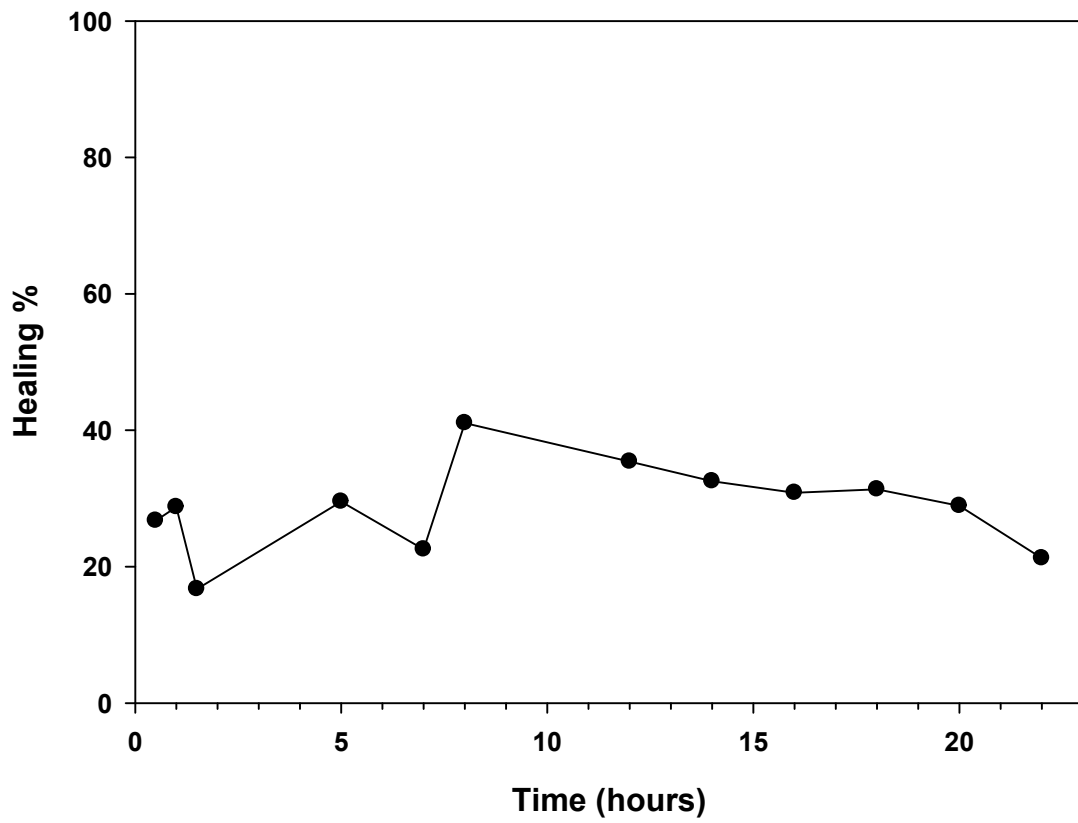

**Figure S6. Healing percentages (as reduction of cross section areas) as a function of time for neat epoxy (ER).**



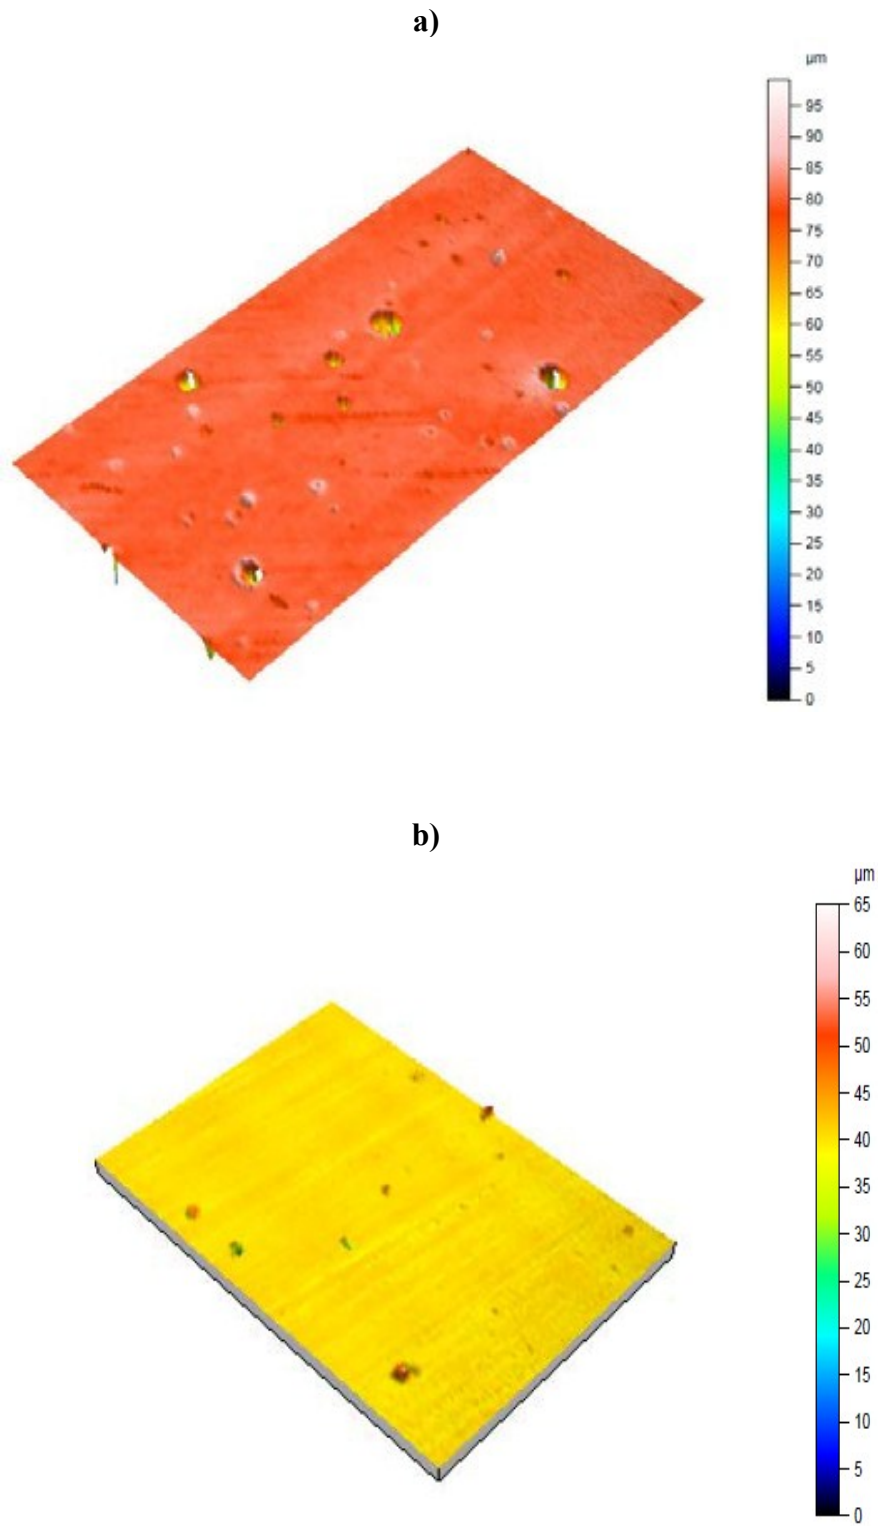

**Figure S7. Surface topography of cross section showing porosity:  
a) ER+9wt.%IL; b) ER+12wt.%IL.**
